# Supplementary material for: Identification of independent risk factors for hypoalbuminemia in patients with CKD stages 3 and 4: the construction of a nomogram
Source: Front Nutr. 2024 Oct 31;11:1453240. doi: 10.3389/fnut.2024.1453240 (PMC11562854; doi:10.3389/fnut.2024.1453240)
Supplement: Supplementary file 1 [file Table_1.XLSX]

## Sheet: Raw data
hypoalbuminemia	Sex	Age	BMI	CKD	Hypertension	Diabetes	Cardiovascular disease	Cerebrovascular?disease	somking	drinking	RBC	HGB	AST	ALT	ALP	BUN	UA	TG	TC	HDL-c	LDL-c	Serum calcium	Serum?phosphorus	Scr	Carbon dioxide binding capacity	Serum sodium	Serum potassium	Serum chloride	Proteinuria	NT-proBNP
0	1	85	24.68	1	1	0	1	0	0	0	3.55	103	18	11	107	6.79	355	2.83	7.38	1.19	4.3	2.32	0.87	168.6	23.5	141	4.25	104.4	0	184
0	0	81	22.77	1	0	0	1	0	0	0	3.71	134	25	10	84	11.1	434	1.86	7.04	0.82	6.71	2.56	4.1	216	31.9	141.7	4.46	100.7	1	1230
0	1	76	21.78	1	1	1	1	0	0	0	3.2	77	30	13	67	9.19	311	3.43	3.4	0.8	1.63	2.25	0.99	108.8	23.1	141.1	3.97	104.5	0	2396
1	1	70	24.44	1	1	0	0	1	0	0	4.92	141	21	20	153	25.7	484	2.34	5.07	0.89	3.02	1.89	0.93	195	22.2	136.7	4.85	96.4	1	1205
0	1	80	20.7	1	1	0	0	0	0	0	4.19	121	21	12	76	4.83	318	1.21	5.28	2	2.82	2.19	0.92	94.9	24.9	139.3	4.03	99.4	0	1147
0	1	82	25.51	1	1	1	1	0	0	0	2.4	79	29	12	90	18.42	458	3.02	4.4	0.85	2.26	2.3	1.15	341.3	21.1	145	5.13	105.5	1	12956
1	1	82	25.78	1	1	1	0	1	0	0	3.31	108	12	9	67	18.58	504	1.79	4.61	0.77	3.17	2.37	1.32	267.5	20.7	142.4	3.77	101.7	0	8173
0	0	54	28.08	1	1	0	0	0	1	0	5.43	166	30	52	243	8.93	649	3.35	5.82	0.84	3.75	2.37	1.2	221.7	24.7	138.2	4.3	98.6	1	11231
0	0	63	20.07	1	1	1	1	0	1	0	4.08	124	35	43	127	12.67	462	1.63	4.43	1.04	2.41	2.25	1.3	355.5	21.1	141.6	4.39	107.1	1	8424
0	1	88	25.78	1	1	1	1	0	0	0	5.58	128	22	30	112	12.9	913	1.8	7.38	1.39	6.21	2.56	1.36	176	28.5	138.1	4.67	101.2	0	3326
0	1	82	24.45	1	1	0	0	0	0	0	4.12	125	25	16	131	15.75	563	1.62	5.53	1.07	3.72	2.23	1.22	202.2	24.1	143.8	4.02	107.2	0	372
1	0	67	17.99	1	0	0	0	0	0	0	1.99	47	26	27	258	10.68	452	7	5.53	0.57	2.82	2.04	1.19	219.9	13.4	140	4.96	111.6	1	1802
0	1	79	24.89	1	1	0	1	0	0	0	3.81	116	18	20	67	8.93	555	1.74	4.91	1.31	2.97	2.16	1.26	122.5	23.8	142.2	3.75	105.8	0	361
1	0	74	20.7	1	1	0	1	0	1	0	3.65	97	162	88	621	11.16	508	1.45	3.01	0.77	1.79	2.13	0.83	157.1	18.7	138.3	5.93	106.7	0	774
1	0	79	26.95	1	1	0	1	1	1	1	3.73	122	10	9	41	30.11	692	1.4	2.64	0.5	1.7	2.01	1.77	621.4	13.7	138.7	3.88	108.2	0	2284
1	1	70	19.17	1	0	1	0	0	0	0	2.8	86	18	15	89	21.1	763	1.14	5.11	1.31	3.06	2.05	1.31	247.6	21	137.9	4.75	104.7	0	29898
0	0	81	25.62	1	1	1	1	0	0	0	3.2	112	12	10	75	19.04	297	0.77	3.99	1.53	2.13	2.12	0.83	387.4	22.5	132.3	5.25	91.2	1	1641
0	0	70	23.66	1	1	0	1	0	0	0	4.29	122	26	28	69	12.49	357	7.81	4.62	0.57	2.88	1.99	1.41	206.6	22.1	141.8	4.52	104.9	1	383
0	0	64	29.75	1	1	1	1	0	0	0	5.12	155	20	15	55	11.23	376	1.7	4.8	0.96	3.17	2.32	1.03	195.1	21.8	140.6	5.08	105.6	1	65.6
0	0	48	27.92	1	1	1	0	0	0	0	4.7	143	43	101	118	20.86	460	1.36	5.74	1.5	3.59	2.29	1.56	268.3	26.3	144.7	4.91	105.6	1	75
0	1	20	29.59	1	1	0	0	0	0	0	4.05	102	14	22	71	11.58	815	2.67	5.27	0.95	3.29	2.28	1.54	218.4	21.6	142.6	4.67	106	1	18322
1	0	57	19.96	1	1	0	1	0	0	0	3.75	110	41	53	101	14.4	508	2.34	5.67	1.7	2.58	1.95	1.19	220.8	29.1	142.9	4.92	106	1	344
0	0	47	23.94	1	0	0	0	0	0	1	4.84	150	20	21	62	11.61	633	4.44	4.62	0.81	2.52	2.02	1.61	181.8	21.9	144.5	4.38	109.9	1	848
1	0	58	22.86	1	1	1	0	0	1	0	4.83	133	14	13	106	11.05	478	2.16	3.76	1.05	1.81	2.22	1.32	283.3	23.2	126.4	6.05	94.3	1	24668
0	0	91	20.07	1	1	0	1	1	0	0	3.79	125	15	11	60	12.9	498	0.92	4.2	1.31	2.76	2.28	1.23	188	21.4	139	7.07	106.5	1	390
1	0	78	19.36	1	1	1	1	0	0	0	2.81	87	52	71	67	13.02	486	1.19	2.37	0.86	1.24	2.19	1.13	148.6	27.1	135.4	4.04	102.4	1	7672
0	1	80	23.11	1	0	0	1	1	0	0	5.3	141	17	8	77	17.23	1032	1.66	3.23	1.05	1.8	2.21	1.08	185	29.6	138.4	4.81	100.4	0	5006
0	0	80	24.97	1	1	1	1	1	0	0	4.21	139	24	16	77	12.59	460	1.8	6.57	1.77	3.94	2.32	1.14	207.7	22.5	132.7	4.15	97.7	0	851
1	0	83	20.24	1	1	0	0	0	0	0	3.29	102	10	8	96	15.9	545	2.68	4.4	0.65	1.41	2.11	1	202.4	17.3	136.9	6.25	105.9	0	10190
0	0	86	17.97	1	1	0	1	1	1	0	3.86	125	21	13	45	6.7	442	1.61	3.41	1.15	1.79	2.23	0.85	141.8	22.2	146.9	4.05	111	0	112
1	1	90	24.44	1	1	0	1	1	0	0	3.44	108	16	15	82	23.8	461	1.55	5.83	1.21	4.03	2.1	1.56	257.5	19.4	141.7	5.87	110.1	0	846.1
0	0	82	25.64	1	1	1	1	1	0	0	5.11	168	17	13	114	8.1	759	2.15	3.78	0.92	1.83	2.31	1.24	187.8	20.1	142.6	4.43	102.1	1	331.3
1	0	74	20.94	1	1	0	0	1	1	1	2.21	83	19	11	80	14.14	746	0.96	2.72	0.94	1.71	2.04	1.18	166.7	23.6	140.7	3.95	103.1	0	1468
1	0	67	25.62	1	1	1	0	0	0	0	3.83	110	16	18	100	11.65	278	2.35	3.75	0.7	2.06	2.14	1.26	232.3	23.1	138.5	4.25	104	1	9396
0	0	20	24.97	1	1	0	0	0	0	0	5.11	151	17	16	130	11.76	752	1.35	4.32	1.16	2.24	2.56	1.34	311.1	19.9	142	5.04	108.5	1	167
0	1	77	31.44	1	1	0	1	1	0	0	5.27	166	24	30	81	13.5	617	1.13	4.82	1.24	3.17	2.24	1.32	239	17.8	141.3	4.49	108.7	1	457
0	0	50	27.68	1	1	0	1	0	1	1	4.79	141	20	32	84	18.15	729	0.35	2.72	0.97	1.27	2.13	1.13	318.2	20.4	139.3	4.63	102.8	1	89.5
1	0	81	24.61	1	1	0	1	0	0	0	4.2	128	30	15	70	14.21	323	3.31	8.8	1.15	4.82	2.36	1	211.6	27.2	138.8	4.87	101.9	0	604
1	0	86	21.26	1	1	1	1	1	0	0	3.9	121	14	11	45	8.3	355	2.88	5.53	1.02	3.16	2.03	1.26	250.6	20.1	139.5	4.43	102.5	0	106
1	1	61	27.11	1	0	0	0	0	0	0	3.97	122	28	69	109	11.67	596	1.06	4.23	0.82	2.54	2.26	0.94	105.4	20	143.1	3.98	108.1	1	170
0	0	86	27.34	1	1	1	1	0	0	0	5.07	161	14	22	64	12.39	325	4.11	5.61	0.7	2.76	2.47	1.23	164.1	18.9	135.8	4.95	99.7	0	106
0	1	69	28.3	1	1	0	0	0	0	0	2.91	91	19	12	96	14.2	525	1.43	4.39	0.99	2.7	2.6	1.02	188.2	19.3	143.8	4.14	107.3	0	276.7
1	1	80	22.89	1	1	0	0	0	0	0	5.14	120	8	17	83	9.2	696	12.76	5.81	0.17	0.3	2.16	1.32	137.7	22.8	136.7	3.53	94.3	1	10190
0	0	87	18.42	1	0	0	1	0	1	0	3.25	103	24	23	70	9.75	410	0.66	2.53	1.05	0.77	2.23	1.03	189	27	145.5	3.75	106.9	0	256
0	1	91	21.37	1	1	0	1	0	0	0	4.09	126	31	22	108	11.06	485	0.93	3.25	0.9	1.64	2.14	1.13	102.8	26.8	137.9	4.85	103.3	0	11231
0	1	79	21.72	1	0	1	0	1	0	0	3.71	116	20	12	57	10.9	735	1.13	3.73	0.89	2.17	2.2	1.28	186.9	20.9	144.2	4.2	110.3	1	922
0	0	82	23.44	1	0	0	0	0	0	0	4.05	122	18	14	73	12.52	490	13.37	6.44	0.57	0.72	2.37	1.21	264	22.1	138.6	4.47	102.3	1	922
0	0	57	24.38	1	1	0	0	0	1	0	4.69	146	18	28	56	12.92	648	2.98	5.91	0.88	3.71	2.27	1.15	255.8	21.4	144	4.25	110.6	1	758
1	0	69	24	1	1	1	1	1	0	0	4.34	132	15	14	77	10.5	490	1.85	7.12	0.84	5.16	2.02	1.42	248.4	22.1	140.7	4.14	108.2	1	199
0	1	53	29.14	1	1	0	1	0	0	0	4.23	119	33	38	43	7.76	324	2.8	6.91	1.18	4.86	2.37	1.36	157.4	20.1	144.5	4.02	110.1	1	218
0	0	84	21.22	1	1	1	0	1	0	0	2.3	74	12	8	53	14.94	566	0.8	2.75	0.82	1.07	2.07	1.15	220.1	23.2	143.1	4.44	108.4	1	10190
0	0	54	23.53	1	1	1	1	0	1	0	4.04	121	12	11	87	19.4	278	1.53	7.18	1.16	6.71	2.44	1.42	498.8	14.6	131.6	8.77	108.5	1	12956
0	0	85	16.61	1	0	0	1	0	0	0	3.54	115	16	14	165	15.59	553	0.83	2.5	0.85	1	2.21	0.93	177.1	18.7	145.5	5.19	112.7	1	3394
0	1	84	24.59	1	1	1	1	0	0	0	3.87	125	19	14	113	11.8	379	1.23	2.93	0.5	5.39	2.28	1.42	191.4	21.1	118.2	5.33	82.4	0	221
0	0	56	28.52	1	0	0	0	0	0	0	4.42	132	11	14	124	10.86	514	1.48	3.89	0.89	2.59	2.28	0.95	202.1	20.4	143.4	4.48	108.8	0	83.8
0	1	54	18.99	1	0	0	1	0	0	0	3.47	115	29	18	122	16.26	546	0.95	3.08	0.93	1.83	2.3	1.13	175.3	17.1	139.7	5.38	103.9	0	35000
0	0	67	26.7	1	1	0	0	0	0	0	3.17	87	17	21	52	19.31	257	0.35	1.82	0.64	1.2	2.09	1.36	527.5	17.5	145.5	4.61	115.8	1	2510
1	0	69	19.63	1	0	0	0	0	0	0	5.42	152	49	46	343	12.37	353	10.8	18.32	0.56	5.4	2.07	1.82	395.3	17.3	136.9	3.57	109.6	1	14648
0	1	57	25.39	1	1	1	0	0	0	0	3.89	107	9	8	132	14.94	1052	2.01	4.26	1.13	2.16	2.37	1.16	253.9	17.4	135.3	4.74	103.4	0	29898
1	1	73	21.93	1	1	1	1	0	0	0	3.4	104	20	16	175	12.48	854	0.9	2.57	0.89	1.04	2.16	1.02	180.2	21.8	137.3	5.81	106.3	0	31244
0	0	75	19.59	1	1	1	0	0	0	0	3.84	125	15	13	76	19.07	469	1.63	2.59	0.64	1.25	2.25	1.08	171.4	19.1	129.2	5.11	101.1	1	668
0	0	80	22.86	1	1	1	1	0	0	0	2.85	90	22	11	141	13.38	759	1.07	3.7	1.16	1.93	2.3	1.08	237.9	16.2	137.7	5.21	111.5	1	982
0	1	86	24.91	1	1	1	1	0	0	0	3.15	96	19	9	29	10.69	628	2.83	6.41	1.01	3.59	2.28	1.75	166.3	27.7	138.9	4.95	103.8	0	2349
0	0	75	23.5	1	1	0	0	0	0	0	2.19	75	20	14	133	7.62	235	0.47	3.27	0.62	1.18	2.01	0.87	216.5	19.7	134.5	3.16	103	1	794
0	1	82	22.81	1	1	0	1	0	0	0	3.3	104	14	10	92	16.1	409	1.92	6.01	0.88	2.96	1.93	1.37	213.3	17.6	147.1	5.51	112.3	1	3691
0	0	46	32.65	1	1	0	1	0	1	0	5.02	160	31	76	61	14.47	549	0.61	3.69	0.85	2.56	2.28	1.07	228.8	23.6	146	3.7	107.3	1	287
0	0	78	22.86	1	1	0	0	0	0	0	5.31	157	13	13	92	29.82	561	1.23	3.74	1.06	1.93	2.39	0.87	239	21.9	147.7	4.78	112.3	1	2065
0	0	66	21.72	1	1	1	1	1	0	0	4.89	154	15	17	57	12.06	735	2.81	4.05	0.79	1.78	2.31	1.3	272.7	20	146.1	4.67	111.3	1	690
0	1	66	24	1	0	0	0	0	0	0	2.85	86	18	11	138	13.11	334	4.51	5.59	0.84	1.76	2.28	1.28	288.1	17.4	141	4.15	109.1	1	386
1	0	66	23.24	1	1	1	0	0	1	0	4.12	116	47	22	224	14.91	561	0.94	3.76	0.87	2.26	1.9	1.15	345.4	23.6	144.6	4.55	113.1	1	35000
1	1	72	29.59	1	1	1	1	0	0	0	4.99	146	22	17	146	9.4	379	4.81	7.47	1.2	3.31	1.98	0.92	175.5	22.1	134.7	3.85	104.6	1	221
0	1	72	24.46	1	1	1	0	1	0	0	5.09	143	19	12	160	10.34	596	1.2	4.09	0.99	2.21	2.23	0.94	152.5	18.8	145.5	3.62	109	1	306
0	0	73	26.95	1	1	1	0	0	0	0	3.34	100	22	11	75	20.42	621	1.22	4.23	1.16	2.24	2.31	1.39	316	19.3	141.2	5.77	111.1	1	284
0	0	56	26.51	1	1	0	0	0	1	0	4.46	123	14	20	67	26.05	252	2.08	4.99	0.77	3.73	2.64	2.09	806.7	20.1	138.7	4.02	99.8	0	3597
1	0	83	26.3	1	1	1	0	1	0	0	4.26	121	14	19	63	19.18	496	4.17	5.96	0.69	1.94	2.2	1.42	264.5	22.3	135.8	4.73	104.6	1	144
0	1	80	25.32	1	1	0	1	0	0	0	3.59	123	25	18	122	11.66	596	3.04	4.27	0.81	2.01	2.21	1.36	176.6	18.5	146.2	4.1	111.8	0	165
1	0	60	20.31	1	1	0	0	0	1	0	3.34	103	17	15	51	13.94	461	1.44	6.86	1.34	3.94	2.11	0.95	167.3	24.2	138.9	4.31	106.8	1	846.1
1	1	78	17.78	1	1	0	0	0	0	0	3.81	117	17	10	69	7.5	303	1.97	5.61	0.8	3.74	1.71	1.23	237.1	22.3	134.9	2.97	102.4	1	4724
0	0	50	27.34	1	1	0	0	1	0	1	5.67	155	24	27	83	10.04	766	1.95	5.4	0.87	4.08	2.18	0.8	135	21.7	143.1	3.4	108.7	0	131
0	1	80	20.7	1	1	0	0	1	0	0	3.3	97	13	7	63	9.91	550	1.56	5.35	1.09	3.56	2.31	1.6	158.5	22.9	138.1	4.09	103.4	1	3257
1	0	50	23.03	1	1	0	0	1	0	0	4.44	122	31	12	164	13.21	481	1.56	3.79	1.33	2.25	2.08	1.51	263.9	22.5	142.2	5.17	105.7	0	374
0	0	73	21.03	1	0	0	0	0	0	0	3.57	95	14	9	77	16.5	615	2.98	3.75	0.66	2.06	2.12	0.89	227.6	23.4	139.8	4.88	108.6	1	1091
0	0	68	22.86	1	1	0	1	0	1	0	4.81	147	215	200	165	30.14	816	3.02	4.11	0.93	1.81	2.2	1.29	234.6	10.5	136.1	6.09	100.3	1	17061
0	0	59	24.11	1	1	1	1	0	0	0	3.71	107	14	14	88	16.14	545	1.93	4.57	0.93	2.38	2.09	1.41	267.4	15.8	140.5	4.49	108.4	1	1309
0	0	54	20.03	1	0	0	0	0	0	0	3.8	117	9	35	97	26.47	372	1.4	3.58	0.91	1.94	2.06	1.64	235	13.2	142.8	4.74	116.6	1	24668
1	0	89	22.66	1	1	0	1	0	0	0	3.19	107	34	60	82	12.86	471	0.95	2.12	0.69	0.82	2.23	0.93	229.6	20.7	141.2	4.34	112	0	1194
1	0	70	26.49	1	1	0	0	0	1	1	4.17	134	22	12	79	12.84	344	1.89	5.98	0.83	4.46	2.1	1.26	289.3	18.7	143.3	4.62	111.2	1	749
1	1	84	21.23	1	1	0	1	0	0	0	4.74	149	66	84	54	32.53	298	0.96	2.59	1.02	1.02	2.16	1.25	200	11.5	128.5	7.44	104.4	1	1059
1	1	82	29.3	1	1	0	0	0	0	0	3.03	89	28	24	66	14.4	473	1.15	5.16	0.98	3.58	2.13	1.54	233.7	18.3	140.1	5.9	112	1	1385
0	0	61	23.44	1	0	0	0	0	1	1	5.56	180	32	20	103	26.73	930	1.6	5.36	1.14	3.6	2.23	2.41	302.7	39.8	143.9	3.38	87	1	31244
1	1	69	36.58	1	1	1	1	0	0	0	4.43	130	36	52	225	10.45	402	1.05	4.03	1.26	2.34	2.11	1.64	198.1	25.2	145.6	5.5	115.3	1	12566
0	1	48	19.56	1	1	1	1	1	0	0	3.25	93	15	11	78	10.9	368	1.62	6.45	1.63	4.09	2.21	1.22	255.4	21.6	139.2	4.07	105.9	1	34719
0	0	73	23.44	1	1	0	1	1	1	0	2.84	103	45	70	113	15.22	424	1.02	3.88	2.07	1.05	2.27	1.3	207	21.3	140.9	5.52	106.6	0	982
0	1	76	20.81	1	1	0	0	0	0	0	2.95	86	15	8	74	11.38	388	4.11	4.57	0.8	1.41	2.13	1.36	197.8	20	143.4	4.58	112.3	1	284
1	1	75	24.2	1	0	1	0	1	0	0	4.02	110	24	27	89	16.6	353	1.57	7.37	1.17	5.38	2.3	1.42	130	16.8	141.1	6.93	109.7	1	350.6
1	1	83	24.39	1	1	1	1	0	0	0	3.2	94	8	14	65	8.22	297	1.94	4.36	1.13	2.38	2.12	1.43	134.8	19.4	131.6	5.84	101.7	1	1861
1	1	78	23.23	1	1	0	0	0	0	0	3.25	94	16	9	46	11.91	324	2.05	8.66	0.82	6.21	1.95	1.36	237.9	21.9	145.5	4.08	114.3	1	1385
0	0	64	21.27	1	1	1	1	0	0	0	2.42	69	41	18	374	26.68	816	1.92	4.32	1.1	2.13	2.04	1.5	516.8	17.1	127.4	4.55	90.9	1	2586
0	0	78	31.44	1	1	0	1	0	1	0	5.98	209	17	14	71	13.64	812	2.94	3.35	0.6	1.63	2.27	1.21	275.1	23.5	139.6	4.43	101.9	0	17061
1	1	63	20	1	1	0	1	0	0	0	2.59	81	19	31	85	31.48	813	3.71	4.69	0.55	2.09	2.04	1.8	571.6	19.2	143.4	4.19	109	1	3597
0	1	91	23.61	1	0	0	1	0	0	0	5.58	175	30	32	90	40.86	812	2.71	5.61	1.13	2.94	2.43	1.85	183	21.3	125.4	5.87	86	0	786
0	1	54	35.82	1	1	1	1	0	0	0	3.92	113	16	11	86	21.24	829	1.94	5.16	1.04	3.39	2.12	1.88	341.6	21	135.7	3.99	100.9	1	35000
1	1	58	21.48	1	1	1	0	0	0	0	4.37	126	13	17	73	14.04	480	4.49	6.64	1.16	2.79	2.16	1.14	176.4	23.6	140.1	4.03	107.3	1	1861
0	0	62	25.39	1	1	1	0	0	0	0	4.58	146	15	20	73	9.8	459	2.71	5.07	0.67	2.94	2.25	1.16	202.4	22.9	144	4.61	110.6	0	383
0	1	68	31.11	1	1	0	0	0	0	0	2.5	83	27	24	98	14.71	310	2.58	6.22	0.81	3.8	2.2	1.73	259	18.5	142	4.26	110.1	0	323
0	0	66	17.97	1	1	0	0	0	0	0	4.31	136	22	7	93	12.9	708	1.53	5.01	0.93	3.22	2.97	1.71	159.6	17.3	135.1	4.26	102.6	0	911
0	1	85	27.11	1	1	1	0	0	0	0	3.42	111	23	15	65	11.71	633	2.85	4.11	0.78	2.03	2.27	1.37	189.8	20.9	141.6	4.45	106.9	0	758
1	0	71	21.27	1	0	1	0	0	0	0	2.22	73	14	11	126	39.22	620	1.3	3.2	0.66	2.1	2.18	1.77	367.8	14.4	136.2	6.61	110.3	0	35000
1	0	75	21.8	1	0	0	0	0	0	0	3.16	98	35	83	123	9.46	225	1.14	5.78	1.66	3.62	2.08	0.88	248.6	21.7	137.8	5.12	106.4	0	2397
1	0	84	23.44	1	1	1	0	0	0	0	3.23	96	24	23	76	7.29	611	1.5	2.62	0.6	0.82	1.91	0.68	160.5	21.6	142.3	3.48	110.5	1	1059
0	0	72	22.86	1	1	0	0	0	0	0	3.36	103	29	15	80	20.19	485	1.51	4.28	1.46	2.07	2.12	1.97	532.3	26.3	141.7	4.95	103.2	1	35000
0	0	44	18.29	0	0	0	0	0	0	0	4.8	135	18	24	63	8.84	414	1.9	4.32	0.72	2.88	2.26	1.09	154.5	20.1	141	4.77	103.6	0	112
0	0	81	25.91	0	1	0	1	0	0	0	4.2	137	15	12	85	6.31	397	0.73	2.6	1.19	1.31	2.56	0.61	123.3	28.9	144.7	4.67	109.6	0	290
0	0	71	20.06	0	1	0	0	1	0	0	4.91	155	20	15	107	4.73	327	1.08	4.77	1.61	2.65	2.33	1.11	104.1	22.9	145.8	4.56	106.3	0	794
0	1	78	25.51	0	1	0	0	1	0	0	4.28	129	21	30	73	11.63	397	1.35	4.66	1.45	2.62	2.24	1.13	148.4	22.7	144.5	4.07	107.3	0	335
0	0	91	29.02	0	1	0	1	0	1	1	3.89	124	22	12	38	7.96	568	0.86	4.67	1.31	3.19	2.18	1.14	100.7	25.8	145.2	4.15	105.1	1	1131
0	0	76	24.01	0	1	1	0	0	0	0	5.95	124	32	31	112	9.17	450	1.51	4.57	0.96	2.88	2.28	1.06	117.5	25.5	144	4.13	103.1	1	117
0	1	46	27.56	0	1	1	0	0	0	0	3.89	115	16	20	70	13.83	627	2.18	6.18	1.03	4.15	2.27	1.33	128.2	23.5	141.4	4.08	105.5	1	390
1	0	52	23.88	0	1	1	0	0	0	1	4.38	143	29	20	103	7.21	453	0.72	7.36	2.67	4.3	1.71	1.03	165.3	23.1	142.8	3.72	107	1	774
0	0	84	21.67	0	1	1	1	0	0	0	4.93	154	22	19	74	9.28	461	0.73	2.7	1.04	1.53	2.19	1.43	125.3	20	144.5	4.54	110.8	0	124
0	1	81	31.11	0	1	1	1	0	0	0	4.24	113	19	18	76	7.63	626	2.05	3.33	0.91	1.87	2.23	1.11	77.8	20.1	142.9	4.45	104.2	0	335
0	1	80	17.9	0	1	0	0	1	0	0	2.97	94	18	13	64	17.96	294	6.72	4.18	0.58	1.24	2.2	1.33	92.4	23.8	145.3	3.99	104.9	0	174
0	1	78	28.89	0	1	1	1	0	0	0	3.84	116	19	18	95	18.7	729	1.73	3.54	1.23	1.65	2.28	1.57	160.1	20.5	137.5	4.75	99.5	0	328
1	1	69	24	0	1	0	0	0	0	0	3.3	103	22	24	39	13	611	1.03	5.91	2.55	2.86	2.07	0.85	151.4	22.8	148.6	2.99	112.4	1	2259
0	0	61	25.16	0	1	1	1	0	1	0	5.43	178	23	20	52	9.61	575	2.86	4.75	0.96	2.5	2.31	0.91	163.9	23.7	142	4.47	102.1	1	124
1	0	88	23.5	0	1	1	0	0	0	0	3.89	105	21	10	127	6.89	759	1.23	3.16	0.78	2.07	1.9	1.17	165.3	22.9	140.4	3.78	105.7	0	974
0	0	83	28.53	0	1	0	0	1	0	0	4.21	137	27	40	74	11.03	749	3.95	5.39	0.75	2.99	2.15	1.3	131.1	21.8	144	4.34	107	0	219
0	0	67	23.66	0	1	0	1	0	1	0	4.25	130	26	23	102	5.32	610	1.06	4.03	1.01	2.77	2.01	0.85	153.9	21.1	146.3	3.69	109.2	1	637
1	0	76	26.08	0	1	1	1	1	1	1	3.25	98	14	11	65	6.6	480	0.95	2.76	1.28	1.35	2.29	1.24	135.8	24	140.8	4.13	103.9	0	17613
0	0	68	21.6	0	0	1	0	0	1	0	4.55	153	12	12	68	6.95	641	1.72	4.83	0.91	3.6	2.39	1.26	113.9	25.6	143.5	4.58	101.7	0	40.3
0	0	53	21.45	0	0	1	1	1	1	0	4.53	134	56	36	117	9.51	812	2.17	3.01	0.55	1.71	2.66	1.26	204.9	20.7	139.1	4.2	105.4	0	131
1	0	79	23.88	0	0	1	1	0	0	0	1.91	57	16	11	58	11.48	411	0.97	2.74	0.79	1.55	1.93	1.36	130.8	21.4	138.4	4.74	107.6	1	891
0	0	55	25	0	1	0	0	0	0	0	4.44	142	27	40	157	11.29	465	2.87	4.89	0.83	3.36	2.41	1.15	148.1	25.5	141.5	4.95	101.4	0	75
0	0	76	19.43	0	0	1	0	1	1	1	4.31	137	23	17	151	12.04	455	0.71	3.27	1.93	1.27	2.2	1.14	155.4	22.1	137.9	5.03	99.6	1	1436
0	0	69	27.89	0	1	0	0	0	1	0	4.55	150	22	21	68	9.94	435	1.5	4.37	0.96	3.14	2.22	0.89	122.5	22.3	145.5	3.96	109.9	1	7840
0	0	79	22.27	0	1	0	1	1	1	1	4.2	136	21	18	140	3.9	577	1.14	5.15	2.1	2.95	2.2	0.75	124.7	22.5	142.8	3.76	105.6	0	618
0	0	60	19.26	0	1	0	0	1	0	0	4.37	144	17	18	58	9.82	455	0.68	4.61	1.97	2.49	2.18	1.07	117.6	19.7	140.8	4.04	109.8	1	3983
0	0	71	20.7	0	1	0	1	0	1	0	4.44	133	20	21	84	7.93	727	1.9	3.45	0.9	2	2.19	1.13	139	22.2	136.4	3.47	100.3	0	71.5
0	0	75	19.36	0	1	0	1	0	0	0	4.28	107	43	41	178	24.38	1109	1.43	3.67	1.34	1.83	2.16	1.47	149.8	21.2	137.8	4.17	95.7	0	3326
0	1	74	22.89	0	1	0	0	1	0	0	4.44	140	16	6	95	8.64	496	1.55	4.57	1.18	3.1	2.29	1.47	121.4	26.5	140.5	3.92	96.6	0	89.5
0	0	69	21.26	0	1	0	0	1	0	0	4.73	146	17	9	54	13.92	378	1.66	3.25	0.64	1.83	2.08	1.45	185.6	18.6	125.5	7.47	96.3	0	229
1	1	70	23.78	0	1	1	1	0	0	0	4.39	124	17	11	68	8.97	503	1.01	4.2	1.52	2.25	2.11	1.28	123	22.3	142.9	4.25	106.1	1	5315
0	1	77	26.56	0	1	1	0	0	0	0	3.84	123	19	12	62	10.4	586	1.86	4.68	1.1	3.02	2.36	1.26	121.6	23.4	141.3	5.01	105.4	0	328
1	0	79	21.05	0	1	0	1	0	0	0	4.81	153	25	18	116	7.35	393	0.82	2.71	0.96	1.44	2.19	1.04	105.5	24.6	142.6	4.22	106.1	0	9350
0	0	62	22.04	0	1	1	0	0	0	0	3.46	113	23	28	81	9.72	455	1.56	4.57	0.95	2.34	2.26	1.24	144.7	26.6	144.2	4.28	106.5	0	152
0	0	85	22.83	0	0	0	1	1	1	1	4.06	127	19	13	100	5.9	313	1.08	4.3	1.31	2.21	2.06	1	120.3	20.5	141.5	4.27	104.9	1	10663
0	1	68	26.95	0	1	1	0	0	0	0	4.92	147	51	52	100	10.94	504	5.26	6.42	0.87	2.47	2.48	0.91	133.2	28.5	136.5	4.58	96.7	0	12566
0	0	58	30.86	0	0	0	0	0	0	0	3.73	129	86	54	54	7.06	336	3.53	8.3	1.2	4.16	2.29	0.91	103.1	26.3	139.3	4.23	101.2	0	922
0	1	78	31.56	0	1	1	0	0	0	0	5.07	150	88	92	85	8.31	437	2.96	4.75	1	2.32	2.33	0.99	87.5	23.2	146.1	4.43	105.4	1	390
0	0	71	22.6	0	1	1	0	0	1	0	4.65	149	25	57	110	7.15	587	1.21	3.64	0.78	2.24	2.28	1.24	136.4	27.9	147.2	4.53	104.2	0	8450
0	1	56	21.78	0	1	1	0	1	0	0	3.47	105	18	12	64	5.39	496	1.87	3.35	0.68	1.55	2.19	1.36	144	22	143.2	4.29	107.5	1	228
0	0	51	29.03	0	1	0	0	0	0	0	4.86	148	23	26	127	6.42	619	2.68	5.16	0.97	2.56	2.18	1.26	186.9	25.5	146.2	2.69	102.7	0	344
0	1	65	25.96	0	1	1	0	0	0	0	4.42	135	22	32	80	7.29	369	1.78	4.63	1.16	2.81	2.43	1.17	156.3	25.6	141.7	4.53	103.9	1	851
0	0	70	19.15	0	0	0	0	0	1	1	3.18	110	39	18	189	6.57	140	1.45	2.86	0.68	1.31	2.33	0.65	176.9	27	140.3	3.84	103.9	1	245
0	1	60	22.32	0	1	1	0	0	0	0	4.37	128	16	11	41	8.78	527	1.79	4.45	1.01	2.6	2.31	1.12	133.2	20.1	142.2	4.38	109.7	1	668
0	1	77	24.89	0	1	1	0	0	0	0	4.49	141	25	21	119	8.6	327	0.81	3.85	1.5	1.85	2.26	1.07	109.7	21.3	136.8	3.88	102.7	1	323
0	1	73	34.22	0	1	1	0	1	0	0	4.02	123	19	22	87	4.91	177	0.9	4.46	1.7	2.06	2.17	0.68	86.1	23.3	138	3.91	102	1	383
0	0	53	26.57	0	0	0	1	0	1	0	5.14	163	26	50	63	7.66	652	1.13	3.83	1.18	1.89	2.41	1.29	132.9	24.6	143.9	4.24	108	0	114
0	0	79	27.04	0	0	1	0	0	0	0	3.86	125	45	37	194	6.67	357	2.74	4.33	0.77	1.5	2.12	0.75	169.8	24	141.9	3.82	103.2	0	396
0	0	49	23.31	0	1	1	1	0	0	0	4.16	117	14	15	95	9.93	501	1.89	3.79	0.77	2.35	2.25	1.29	188	27.9	145.8	4.87	106.1	1	2203
0	1	53	29.14	0	1	0	1	0	0	0	4.23	119	33	38	43	7.76	324	2.8	6.91	1.18	4.86	2.37	1.36	157.4	20.1	144.5	4.02	110.1	1	218
0	1	40	22.06	0	1	0	0	0	0	0	4.51	126	15	15	88	7.8	439	0.57	5.87	1.41	4.21	2.12	1.31	134.5	19	140.5	3.33	104.5	1	459
1	0	78	16.16	0	1	0	1	1	0	0	5.05	139	51	49	75	10.64	686	0.71	4.23	1.12	2.71	2.1	0.91	135.9	22.7	141.4	3.79	106.4	1	1436
0	0	55	23.38	0	1	1	1	0	1	1	5.06	154	18	33	123	5.49	782	3.09	6.26	1.23	4.03	2.58	1.13	125.4	26	139.2	4.46	102	0	14893
1	0	69	16.3	0	1	0	0	0	0	0	4.43	123	18	14	88	12.75	455	0.94	4.03	1.16	2.54	2.19	0.96	153.2	23.3	144.4	4.86	105.5	0	911
0	1	85	31.22	0	1	0	1	0	0	0	3.85	113	34	16	118	9.83	843	0.81	4.23	1.61	1.99	2.26	1.19	143.8	17.9	143.9	4.47	108.6	0	7887
0	0	49	30.46	0	1	0	1	0	1	1	5.07	147	17	22	97	5.32	626	1.2	2.35	0.62	1	2.19	1.2	141.3	21.9	146.9	3.94	114.6	0	548
0	0	52	24.9	0	0	1	0	0	0	0	5.01	172	28	33	62	7.14	370	1.72	5.97	1.18	4.11	2.22	1.34	108.7	28.9	142.3	4	100.7	1	131
0	1	77	29	0	1	1	1	1	0	0	4.29	140	18	15	52	7.8	510	2.98	5.15	0.85	2.94	2.39	1.1	85.3	23.5	144.8	4.16	108.2	0	418
0	0	67	24.91	0	1	0	0	0	0	1	3.88	126	15	12	79	10.58	344	2.35	0.78	1.33	5.39	1.22	4.1	158.6	21.1	142.3	5.57	108.8	0	287
1	0	64	21.63	0	1	1	0	0	0	0	4.7	141	38	45	119	4.1	356	1.2	3.89	1.29	2.06	2.18	1.21	120.2	22	142.1	4.39	109.2	1	1488
0	1	78	16.42	0	1	0	1	0	0	0	3.07	98	20	11	96	21.46	634	1.17	3.65	1.04	1.86	2.12	1.29	144	18.6	143.3	4.29	106.9	0	28280
0	0	77	29.39	0	1	1	1	0	0	0	5.04	164	24	25	68	8.73	652	0.78	3.92	1.51	1.88	2.16	1.29	120.6	21.8	137.9	4.67	104.7	0	545
0	1	27	27.89	0	0	0	0	1	0	0	3.76	106	28	32	70	8.28	504	3.58	4.11	0.66	2.07	2.07	0.91	153.6	20.2	143.6	4.05	110.2	1	198
1	1	74	28.89	0	1	1	0	0	0	0	2.38	72	10	9	112	15.33	640	0.97	5.83	0.82	5.01	2.14	1.43	168.9	16.1	132	5.72	104.8	0	788
1	0	67	20.07	0	0	1	0	0	0	0	2.35	65	19	15	74	14.1	738	0.63	2.75	0.93	1.18	2.09	1.37	237.1	19.6	129.8	4.66	95.5	1	864
0	0	53	24.08	0	1	0	0	0	0	0	5.43	165	24	24	79	7.3	525	2.01	4.96	0.84	3.39	2.16	0.83	148.3	21.3	140.5	3.25	105.6	1	204
0	0	75	20.08	0	1	1	0	0	0	0	4.14	133	18	13	29	9.68	430	5.24	5.73	0.56	2.97	2.31	1.32	159.4	19.7	141.1	5.45	107.2	1	171
0	0	60	22.84	0	0	0	0	0	0	0	3.58	110	17	15	106	9.51	929	3.29	4.87	1.04	2.11	2.28	1.43	156.1	21.2	144.2	3.73	107.1	0	3326
0	1	77	23.63	0	1	0	0	0	0	0	4.6	145	27	14	63	5.21	370	0.92	6.27	1.31	4.43	2.33	1.27	89.7	23.1	142.9	4.69	105.9	0	243
0	1	55	22.58	0	1	0	0	0	0	0	4.59	141	23	15	83	12.15	561	1.33	5.13	0.91	3.3	2.4	1.34	131.2	23.6	146.8	3.89	108.5	0	204
1	0	81	23.31	0	1	1	0	0	0	0	3.59	99	18	19	62	11.05	284	1.24	5.64	1.65	3.36	2.22	0.82	123.4	28.9	139.4	3.62	104.9	1	851
0	0	51	19.27	0	0	0	0	0	1	0	4.23	136	26	19	34	10.02	426	1.94	4.82	0.74	2.82	2.18	1.42	152.6	22.1	147.2	4.56	110.1	1	128
0	0	47	24.34	0	0	0	0	0	0	0	4.71	136	18	14	99	7.5	649	1.26	4.52	0.92	3.24	2.32	1.29	153.6	21.6	140.2	4.27	104.4	0	122
0	0	42	24.46	0	0	0	0	0	0	0	4.82	152	16	19	95	9.63	725	2.97	4.26	0.67	1.99	2.27	0.68	138.7	26	139	3.98	107.8	1	177
1	0	52	23.5	0	1	1	0	0	0	0	4.32	121	26	22	144	6.96	510	1.82	3.6	0.7	1.81	2.2	1.03	220.6	20.8	141.8	3.46	108.8	1	857
0	1	58	17.63	0	0	0	0	0	0	0	4.11	134	25	24	95	6.28	315	0.99	4.58	1.66	1.98	2.26	1.44	99.1	21	143.5	4.25	108.9	1	101
0	0	85	26.99	0	1	0	1	0	1	0	3.94	127	24	22	91	5.94	463	1.64	3.85	0.94	2.26	2.32	1.07	138.7	22.9	144.5	4.78	108.7	1	220
0	0	50	27.92	0	1	0	0	1	0	0	3.08	96	32	17	53	24.67	585	4.61	11.18	1.49	6.87	2.42	1.21	262.6	23.9	138.2	3.94	100.9	0	607
1	1	51	19.2	0	1	0	0	0	0	0	4.46	134	15	17	37	10.31	362	2.39	7.68	2.56	3.16	2.4	1.31	112.9	21.7	148.4	3.72	111.4	1	101
1	0	22	24.97	0	0	0	0	0	0	0	4.71	132	18	8	56	6.74	476	1.47	7.14	1.27	5.28	2.16	1.13	199.3	22.8	147.9	3.56	112.5	1	199
0	0	77	20.45	0	1	0	0	0	0	0	4.67	149	20	6	70	9.29	328	1.12	5.76	1.71	3.62	2.27	1.36	107.1	22.6	142.5	4.35	107.5	0	127
1	0	62	26.3	0	1	0	0	0	0	0	4.79	156	31	25	88	5.03	576	1.98	6.08	0.65	4.11	2	0.9	139.3	23.3	145.8	3.33	109.4	1	124
1	1	69	21.33	0	1	1	0	0	0	0	3.5	106	29	25	59	13.94	423	1.44	4.45	1.61	1.43	1.98	0.89	137.5	24.2	143.1	3.3	106.1	1	535
0	0	91	22.77	0	1	0	1	1	0	0	4.34	135	23	9	90	9.01	683	0.96	5.46	1.27	3.72	2.25	0.87	168.7	25.3	144.2	4.23	105	0	193
1	0	60	23.31	0	1	1	0	0	0	0	3.16	98	20	20	44	16.07	429	0.84	5.98	1.63	3.63	1.98	1.18	161.2	18.7	142.2	4.89	113.9	1	851
1	0	81	26.95	0	1	0	0	1	0	0	3.63	96	138	145	96	18.49	315	0.81	3.47	0.89	1.97	1.96	1.61	151.4	20.8	144.3	4.64	112.9	1	604
0	0	84	22.22	0	1	1	1	1	0	0	4.68	148	31	30	139	10.96	554	1.32	3.98	1.48	1.33	2.36	1.26	123.7	22.6	137.8	4.58	92.4	1	66.2
0	1	84	21.1	0	1	0	0	0	0	0	3.7	103	14	8	61	19.54	835	1.83	5.68	0.73	4.13	2.09	1.32	260.5	20.1	142.5	4.6	107.9	1	308
0	1	78	19.56	0	1	0	0	0	0	0	3.97	118	44	55	122	10.3	548	1.66	4.79	1.18	2.83	2.17	0.75	118.9	20.8	143.2	3.81	111.9	1	101
0	1	85	28.04	0	1	1	0	0	0	0	3.95	117	19	11	59	10.34	689	2.04	4.44	0.7	2.63	2.13	1.27	120.3	22.4	145.7	4.78	114.2	1	848
0	0	66	25.15	0	1	0	1	0	0	0	4.23	127	22	37	61	7.84	421	1.32	5.59	1.47	3.43	2.15	1.03	115.3	23	143.9	3.55	106.3	1	70.2
0	0	53	28.7	0	1	1	0	0	0	0	5.47	158	15	21	59	6.83	682	6.01	5.6	0.74	1.88	2.23	1.18	134.8	24.2	143.3	3.89	103.8	1	398
0	0	75	26.29	0	1	0	1	0	0	0	4.2	141	26	20	66	6.02	356	2.87	5.83	1.21	3.93	2.2	0.93	104.8	24.8	145	4.44	111.2	0	396
0	0	74	22.06	0	1	0	0	1	0	0	4.37	139	22	14	79	13.6	652	0.86	5.66	1.8	2.97	2.39	0.75	164.5	22.5	142.3	3.82	107.8	1	953
0	0	81	24.34	0	1	1	1	0	1	0	5.38	165	19	20	81	12.28	571	1.6	3.54	1.18	1.41	2.38	1.11	140.7	25.4	144.4	4.02	100	0	208
1	0	66	20.2	0	1	0	0	0	0	0	4.08	133	26	9	46	9.08	401	0.95	5.78	1.84	3.21	2.15	1.14	159.6	23.3	144	4.5	109.4	1	454
0	0	75	28.9	0	1	0	1	1	1	0	5.25	172	22	18	96	5.65	458	1.24	3.78	1.17	1.99	2.24	1.02	133	28.7	146.4	3.74	102.4	0	7760
0	0	80	19.49	0	1	1	1	0	0	0	4.87	117	36	47	85	9.91	538	1.01	4.29	1.24	2.54	2.15	1.11	106.7	22.5	144.3	3.93	106.8	0	3983
1	1	71	26.13	0	1	0	0	0	0	0	4.5	138	19	16	87	6.28	493	2.91	4.86	1.07	2.1	2.24	1.08	101	24.8	142	3.35	106.3	1	385
0	1	66	27.73	0	1	0	0	0	0	0	3.86	115	38	19	53	6.86	447	2.47	6.99	1.19	3.99	2.21	1.09	122	27.8	141.3	3.71	101.6	1	112
0	0	72	26.3	0	1	0	1	1	0	0	5.48	132	38	45	55	7.06	445	0.47	2.57	0.97	1.26	2.17	1	134.2	24.3	145.5	4.37	110.5	0	65.3
0	0	60	25.93	0	0	0	1	0	0	0	5.28	152	13	17	82	3.55	256	0.9	4.95	1.26	3.67	2.22	1.07	161.7	22.9	141.6	4.09	106.2	1	40.3
1	0	84	21.22	0	1	0	1	0	0	0	3.51	82	9	5	113	18.7	850	0.87	1.89	0.86	0.54	2.01	1.71	172.5	23	141.7	4.81	109.8	0	14893
0	0	79	25.21	0	1	0	1	1	1	1	4.59	151	22	15	60	7.4	529	1.15	3.33	1.26	1.6	2.39	1.08	151.7	25.1	141.6	4.25	105.6	1	398
0	0	73	29.07	0	1	0	1	1	0	0	6.82	192	38	43	102	7.95	349	1.81	3.04	0.72	1.52	2.14	0.61	114.3	21.8	145.3	4.43	114	1	8272
0	0	88	26.56	0	1	0	0	1	0	0	3.73	117	40	51	77	5.15	418	0.5	2.62	1.4	0.76	2.09	1.04	113.1	21.6	138.6	4.36	105.2	0	318
0	1	56	23.5	0	1	1	0	1	0	0	4.72	148	21	18	78	9.16	681	7	6.54	1.01	2.82	2.46	1.26	94.5	23.3	139.5	3.53	99.1	0	36.1
0	0	76	23.83	0	1	0	0	0	0	0	4.99	153	55	18	132	9.16	538	1.54	4.92	0.84	3.48	2.18	0.85	118.6	23.2	140.7	4.15	104.6	1	1144
0	1	67	22.22	0	1	0	0	0	0	0	3.5	106	15	12	63	9.9	478	2.91	5.77	1.16	3.02	2.32	1.11	122.2	21.7	139.1	4.06	104.7	0	65.6
0	1	69	21.09	0	1	0	0	0	0	0	3.81	117	23	16	60	13.66	463	2.33	7.38	1.39	4.96	2.36	1.02	145.3	21.1	144	3.64	108.9	0	690
0	0	57	24.95	0	1	0	0	1	1	0	5.27	163	29	41	85	8.58	308	1.46	3.32	1.17	1.52	2.28	1.12	160.9	24.3	144.1	4.12	109.7	1	204
0	0	50	23.38	0	1	1	1	0	0	0	2.93	99	15	11	123	10.63	844	1.28	2.93	0.5	2.09	2.25	1.27	126.5	28.1	144.4	4.09	104.1	0	18322
0	0	65	20.55	0	0	1	0	0	0	0	4.43	148	20	14	61	5.42	379	1.19	4.55	1.05	2.79	2.15	1.06	135.1	22.8	144.2	4.2	107.6	0	287
1	0	66	16.14	0	1	0	0	0	0	0	4.79	147	25	5	86	13.97	779	1.57	4.12	0.96	2.25	3.1	1.51	218.5	19.1	136	3.95	102.1	0	14893
0	0	59	21.94	0	1	0	0	0	0	0	4.52	131	18	15	69	9.27	420	7.81	5.53	0.5	1.21	2.23	1.3	132.9	21.9	139.9	3.84	102.2	0	113
0	0	57	23.18	0	1	1	0	0	1	1	5.12	137	25	24	144	4.09	260	1.13	3.79	0.95	2.22	2.39	1.44	116.4	23.9	149.7	4.94	115.2	0	163
0	0	82	24.49	0	1	1	1	0	1	0	4.79	145	17	18	123	8.97	696	1.55	3.82	0.96	2.39	2.13	0.88	119	21.1	142.7	4.93	109.5	1	396
1	0	74	27.55	0	0	0	0	0	1	1	3.93	121	24	20	84	7.11	575	5.79	8.65	1.16	2.7	1.95	0.92	120	24.5	141.2	4.25	108.8	1	199
0	0	65	20.18	0	0	1	0	0	1	0	5.43	152	17	19	73	10.5	512	1.55	4.18	1.07	2.33	2.31	1.34	133.7	18.3	139.9	4.31	106.5	0	764
0	1	75	23.83	0	1	1	0	0	0	0	5.12	151	28	29	52	7.15	356	1.32	7.28	1.81	5.01	1.96	1.53	92.6	30.3	140.7	3.13	97.8	0	131
0	0	79	20.7	0	0	0	0	0	1	0	3.84	115	29	18	75	6.14	522	1.48	3.6	0.94	2.18	2.09	0.89	147.6	20.4	140.5	4.18	106.5	1	361
1	0	76	25.34	0	1	1	1	0	0	0	5.35	167	10	14	75	11.89	548	1.22	5.12	1.42	3.04	2.13	0.88	157.7	26	137.6	3.36	99.5	0	2480
0	0	61	26.06	0	1	0	0	0	0	0	4.84	152	29	54	93	8.41	529	1.28	4.15	1.05	2.4	2.4	1.09	128.5	21.9	143.4	4.18	109.1	0	758
0	0	60	23.44	0	0	0	0	0	1	0	5.2	160	23	30	78	4.55	432	2.03	7.18	1.07	5.33	2.35	0.92	97.5	23.9	145.1	3.65	108.6	0	131
0	0	80	26.35	0	0	0	1	0	0	0	5.5	161	31	39	57	9.58	530	0.89	4.05	1.24	2.5	2.2	0.87	113.5	23.5	142.9	4.58	110.7	0	5371
0	1	65	29.97	0	1	0	0	0	0	0	4.2	123	20	20	62	12.49	646	2.13	7.04	1.16	5.25	2.4	1.41	218.7	19.4	138.6	5.43	104.6	1	166
